# Supplementary material for: Biochemical characterization of a novel azo reductase named BVU5 from the bacterial flora DDMZ1: application for decolorization of azo dyes
Source: Royal Society of Chemistry journal article supplement (doi:10.1039/d1ra08090c), 2022-01-01
Supplement: d1ra08090c1.pdf [file d1ra08090c1.pdf]

## **Supporting Information for**

### **Biochemical characterization of a novel azo reductase named BVU5 from the bacterial flora DDMZ1: application for decolorization azo dyes**

Junhao Cong<sup>a</sup>, Xuehui Xie<sup>a,b\*</sup>, Yanbiao Liu<sup>a</sup>, Yan Qin<sup>a</sup>, Jiao Fan<sup>a</sup>, Yingrong Fang<sup>a</sup>, Na Liu<sup>c</sup>,  
Qingyun Zhang<sup>d</sup>, Xinshan Song<sup>a,b</sup>, Wolfgang Sand<sup>a,e</sup>

<sup>a</sup> College of Environmental Science and Engineering; State Environmental Protection Engineering Center for Pollution Treatment and Control in Textile Industry; Key Laboratory of Pollution Control and Emission Reduction Technology for Textile Industry, Donghua University, Shanghai 201620, China;

<sup>b</sup> Shanghai Institute of Pollution Control and Ecological Security, Shanghai 200092, P.R. China;

<sup>c</sup> School of Environment and Surveying Engineering, Suzhou University, Suzhou, Anhui 234000, China;

<sup>d</sup> School of Chemical and Environmental Engineering, Anhui Polytechnic University, Wuhu, Anhui 241000, China;

<sup>e</sup> Institute of Biosciences, Freiberg University of Mining and Technology, Freiberg, 09599, Germany.

## Table of Content

|                                                                                         |   |
|-----------------------------------------------------------------------------------------|---|
| <b>Fig. S1A.</b> Recombinant plasmid of MBP-BVU5.....                                   | 2 |
| <b>Fig. S1B.</b> SDS-PAGE analysis of enzyme BVU5 .....                                 | 3 |
| <b>Table S1</b> Decolorization effect of different dyes reacted only with coenzyme NADH | 3 |
| <b>Fig. S2.</b> The UV-Vis spectra of BVU5 decolorizing RB5.....                        | 4 |
| <b>Fig. S3.</b> The UV-Vis spectra change of coenzyme NADH .....                        | 4 |
| <b>Fig. S4.</b> The FTIR spectrum after enzyme decolorizing dye.....                    | 5 |
| <b>Fig. S5.</b> The FTIR spectrum of dye after coenzyme treatment.....                  | 5 |

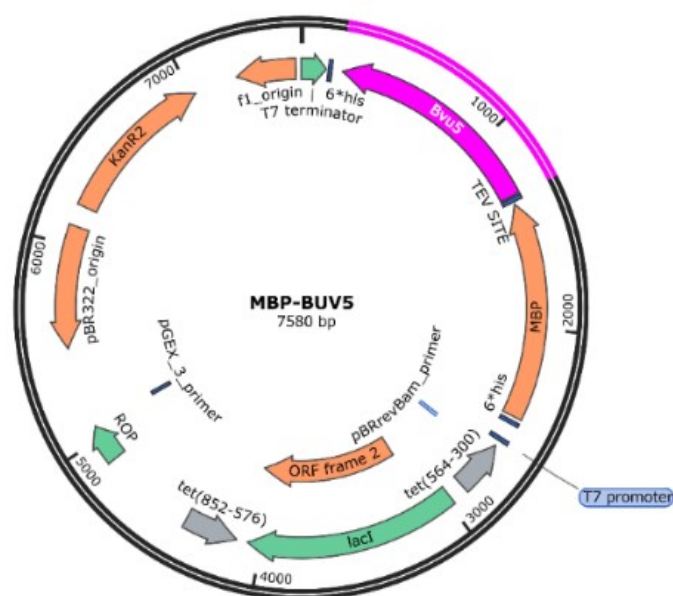

**Fig.S1. (A)** Recombinant plasmid of MBP-BVU5

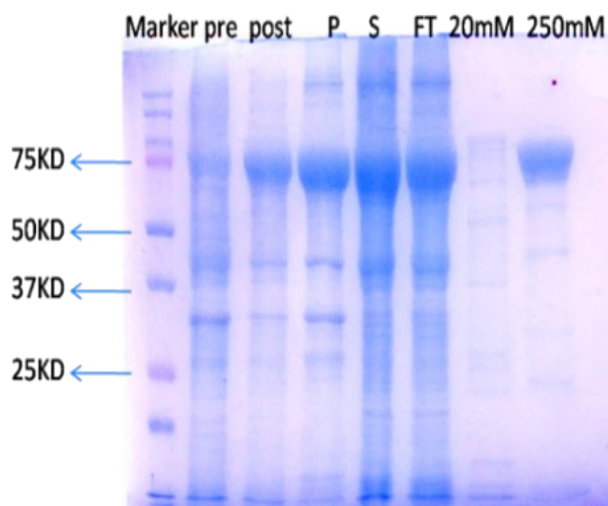

**Fig.S1. (B)** SDS-PAGE analysis of enzyme BVU5.

Pre, protein unexpressed; post, protein expression; P, precipitation; S, supernatant; FT, Ni-NTA flow-through solution; 20 mM and 250 mM imidazole eluent purified enzyme BVU5.

**Table S1** Decolorization effect of different dyes reacted only with coenzyme NADH (dye concentration of 100 mg/L, incubation for 30 mins)

| Dye types | Azo dyes |   |   |   |   |   |   | Anthraquinone dyes |   |    | triphenylmethane dyes |    |    |    |
|-----------|----------|---|---|---|---|---|---|--------------------|---|----|-----------------------|----|----|----|
|           | 1        | 2 | 3 | 4 | 5 | 6 | 7 | 8                  | 9 | 10 | 11                    | 12 | 13 | 14 |
| Time      |          |   |   |   |   |   |   |                    |   |    |                       |    |    |    |
| 0 h       |          |   |   |   |   |   |   |                    |   |    |                       |    |    |    |
| 0.5 h     |          |   |   |   |   |   |   |                    |   |    |                       |    |    |    |
| 1 h       |          |   |   |   |   |   |   |                    |   |    |                       |    |    |    |

Note: Azo dyes: 1- Reactive Black 5, 2-Trypan Blue, 3-Chlorazol Black E, 4-Acid Orange 7, 5-Acid Black 1, 6- Acid Red 112, 7-  $\alpha$ -Naphthol Orange. Anthraquinone dyes: 8-Acid Blue 40, 9-Reactive Blue 4, 10-Reactive Blue 19. Triphenylmethane dyes: 11-Malachite Green, 12-Brilliantgreen, 13-Fuchsin Basic, 14-Crystal Violet.

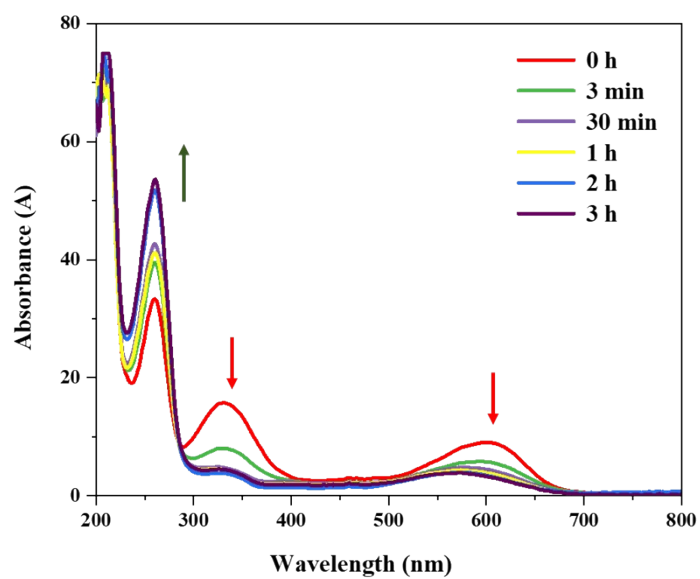

**Fig.S2.** The UV-Vis spectra of BVU5 decolorizing RB5

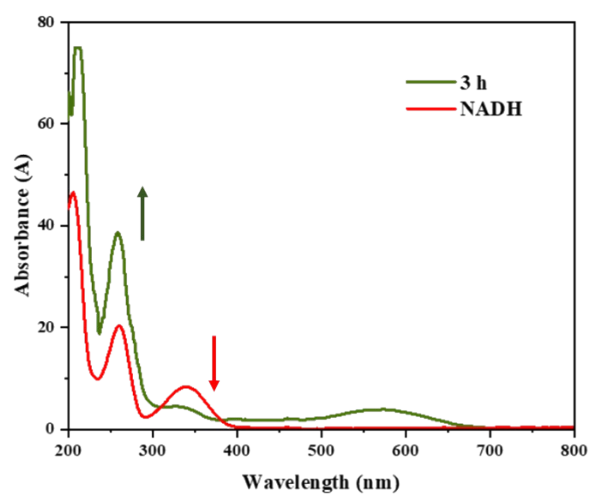

**Fig.S3.** The UV-Vis spectra change of coenzyme NADH

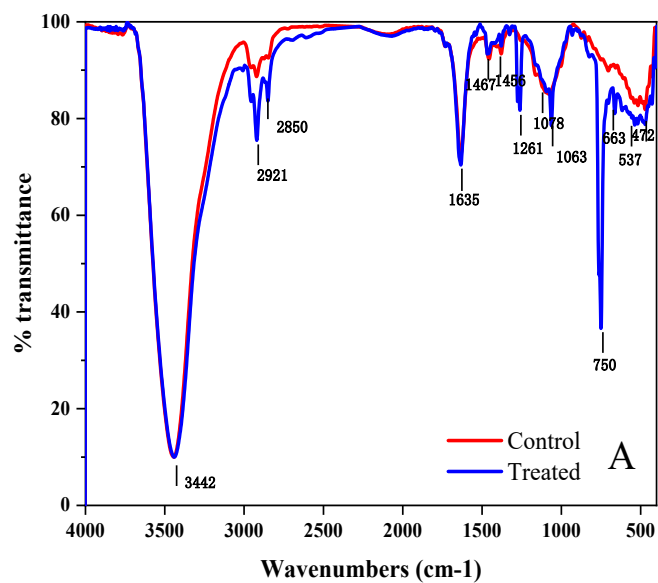

**Fig.S4.** The FTIR spectrum after enzyme decolorizing dye

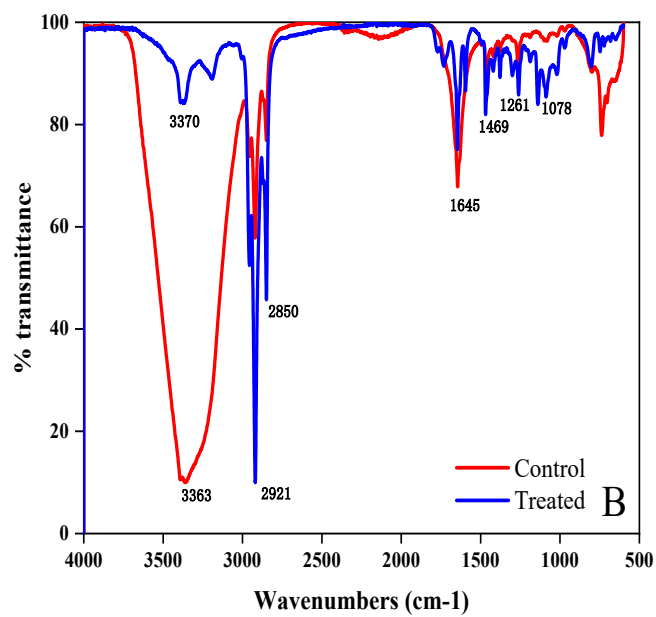

**Fig.S5.** The FTIR spectrum of dye after coenzyme treatment
